# Supplementary figures and images for: A circularly polarized luminescent organogel based on a Pt(ii) complex possessing phenylisoxazoles
Source: Royal Society of Chemistry journal article supplement (doi:10.1039/c7qm00564d), 2018-01-01

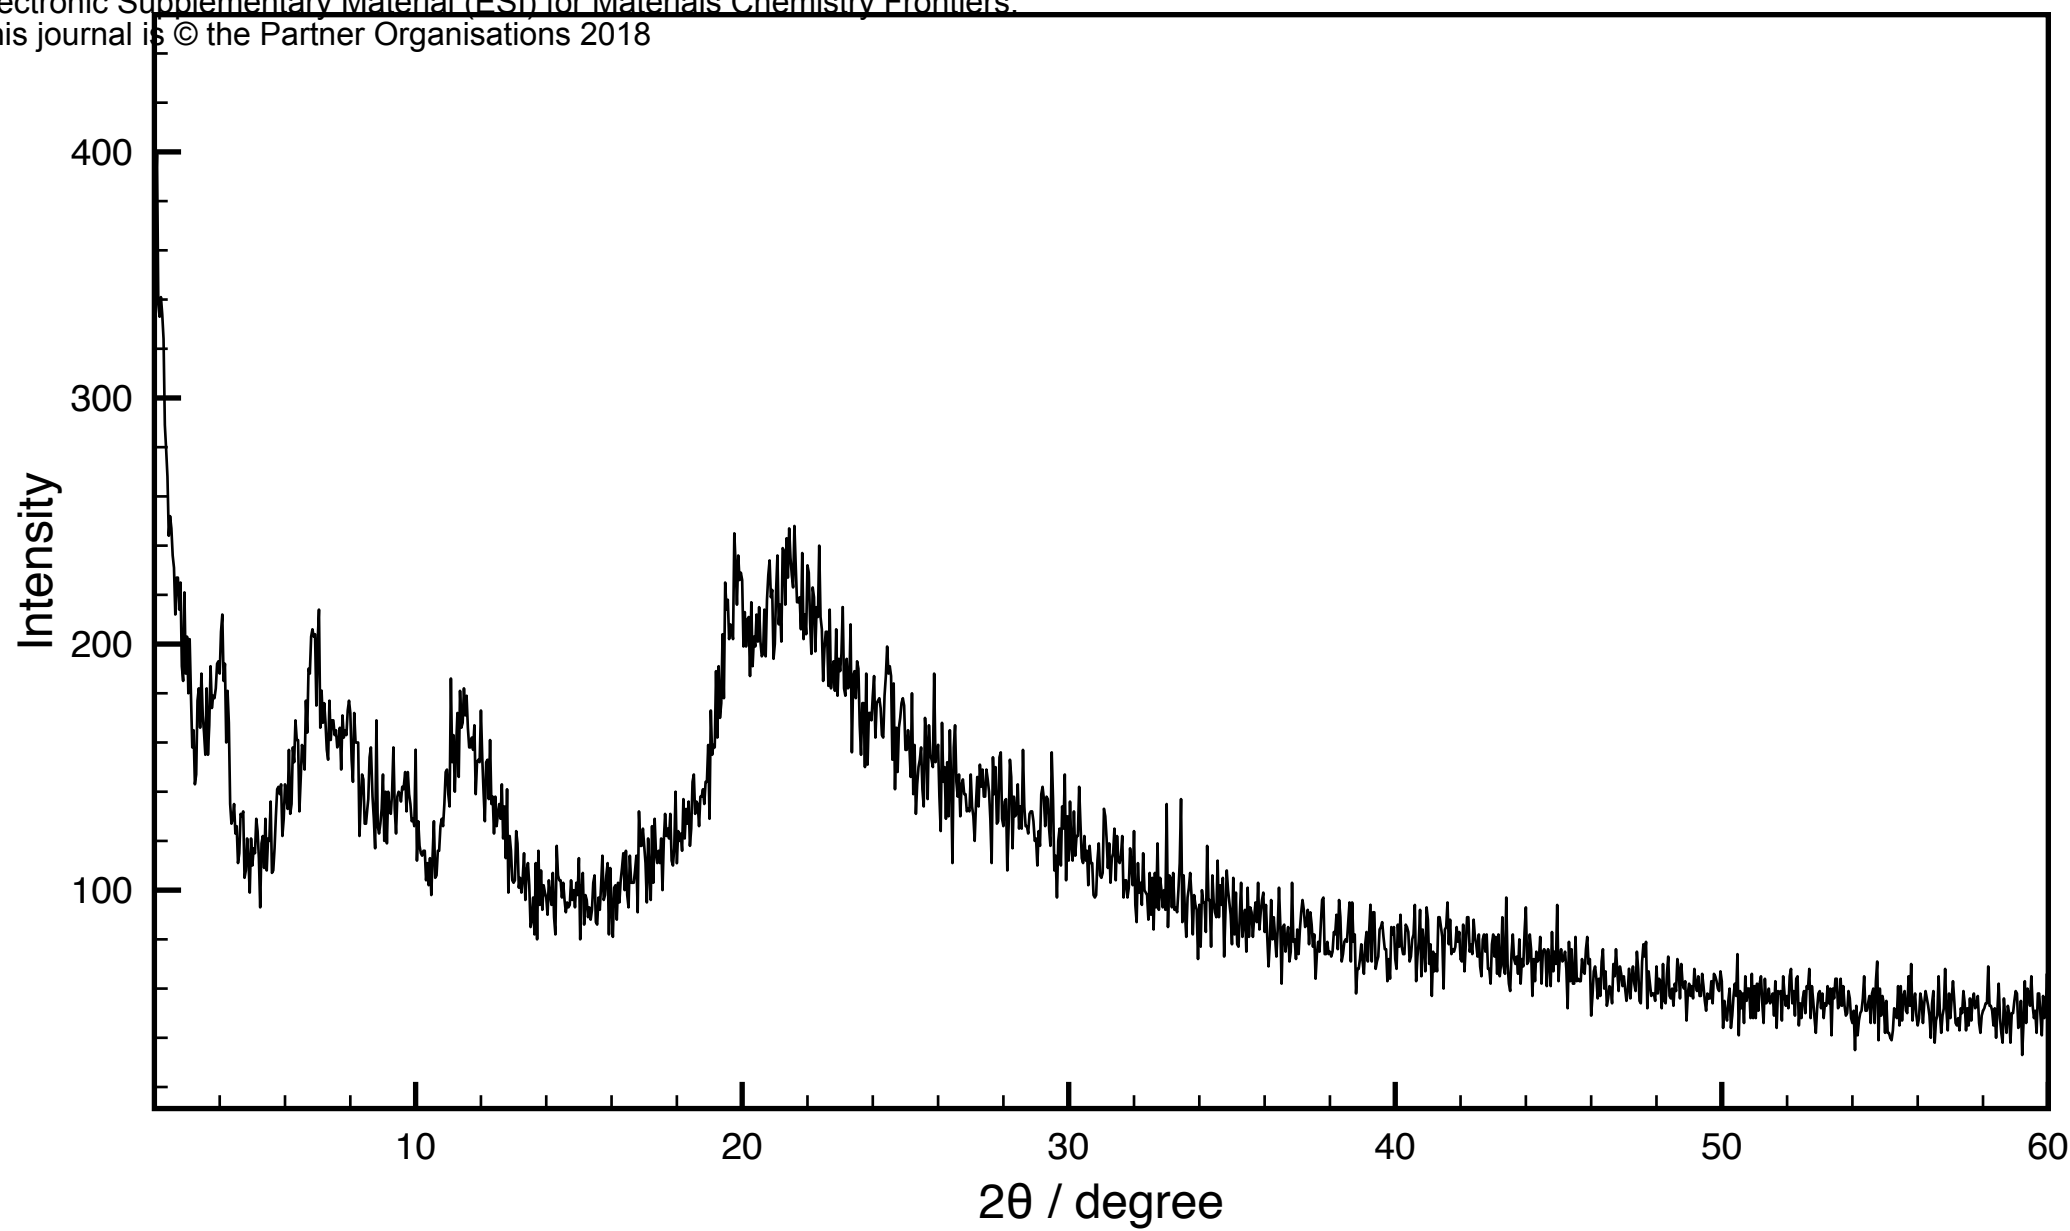

Supplement: c7qm00564d2.pdf [file c7qm00564d2.pdf]
